# Supplementary material
Source: ML conference proceedings conference paper supplement (https://openaccess.thecvf.com/content/CVPR2024/html/Yu_InceptionNeXt_When_Inception_CVPR_2024_paper.html)
Supplement: Supplementary file 1 [file Yu_InceptionNeXt_When_Inception_CVPR_2024_supplemental.pdf]

# InceptionNeXt: When Inception Meets ConvNeXt

## – Supplementary Material –

Weihaoyu<sup>1</sup> Pan Zhou<sup>2,3</sup> Shuicheng Yan<sup>4</sup> Xinchao Wang<sup>1\*</sup>

<sup>1</sup>National University of Singapore <sup>2</sup>Singapore Management University <sup>3</sup>Sea AI Lab <sup>4</sup>Skywork AI  
 weihaoyu@u.nus.edu panzhou@smu.edu.sg shuicheng.yan@kunlun-inc.com xinchao@nus.edu.sg

Code: <https://github.com/sail-sg/inceptionnext>

### A. Hyper-parameters

#### A.1. ImageNet-1K image classification

On ImageNet-1K [2, 8] classification benchmark, following ConvNeXt [6] and ConvNeXt-A trained by timm [12], we adopt the hyper-parameters shown in Table 1 to train InceptionNeXt at the input resolution of 224<sup>2</sup> and fine-tune it at 384<sup>2</sup>. Our code is implemented by PyTorch [7] based on timm library [12].

#### A.2. Semantic segmentation

For ADE20K [16] semantic segmentation, we utilize ConvNeXt as the backbone with UpNet [14] following the configs of Swin [5], and FPN [4] following the configs of PVT [11] and PoolFormer [15]. The backbone is initialized by checkpoints pre-trained on ImageNet-1K at the resolution of 224<sup>2</sup>. The peak stochastic depth rates of the InceptionNeXt backbone are shown in Table 2. Our implementation is based on PyTorch [7] and mmsegmentation library [1].

### B. Qualitative results

Grad-CAM [9] is employed to visualize the activation maps of different models trained on ImageNet-1K, including RSB-ResNet-50 [3, 13], Swin-T [5], ConvNeXt-T [6] and our InceptionNeXt-T. The results are shown in Figure 1. Compared with other models, InceptionNeXt-T locates key parts more accurately with smaller activation areas.

|                            | InceptionNeXt    |     |                  |                  |
|----------------------------|------------------|-----|------------------|------------------|
|                            | Train            |     |                  | Finetune         |
|                            | A                | T   | S                | B                |
| Input resolution           | 224 <sup>2</sup> |     | 224 <sup>2</sup> | 384 <sup>2</sup> |
| Epochs                     | 450              |     | 300              | 30               |
| Batch size                 | 1280             |     | 4096             | 1024             |
| Optimizer                  | AdamW            |     | AdamW            | AdamW            |
| Adam $\epsilon$            | 1e-8             |     | 1e-8             | 1e-8             |
| Adam $(\beta_1, \beta_2)$  | (0.9, 0.999)     |     | (0.9, 0.999)     | (0.9, 0.999)     |
| Learning rate              | 1e-3             |     | 4e-3             | 5e-5             |
| Learning rate decay        | Cosine           |     | Cosine           | Cosine           |
| Gradient clipping          | None             |     | None             | None             |
| Warmup epochs              | 5                |     | 20               | None             |
| Weight decay               | 0.05             |     | 0.05             | 0.05             |
| Rand Augment               | 5/uniform        |     | 9/0.5            | 9/0.5            |
| Repeated Augmentation      | off              |     | off              | off              |
| Cutmix                     | 1.0              |     | 1.0              | 1.0              |
| Mixup                      | 0.2              |     | 0.8              | 0.8              |
| Cutmix-Mixup switch prob   | 0.5              |     | 0.5              | 0.5              |
| Random erasing prob        | 0.1              |     | 0.25             | 0.25             |
| Label smoothing            | 0.1              |     | 0.1              | 0.1              |
| Peak stochastic depth rate | 0.1              | 0.1 | 0.3              | 0.4              |
| Dropout in classifier      | 0.0              |     | 0.0              | 0.5              |
| LayerScale initialization  | 1e-6             |     | 1e-6             | Pre-trained      |
| Random erasing prob        | 0.1              |     | 0.25             | 0.25             |
| EMA decay rate             | None             |     | None             | 0.9999           |

Table 1. Hyper-parameters of InceptionNeXt on ImageNet-1K image classification.

| Method       | InceptionNeXt stochastic depth rate |     |     |
|--------------|-------------------------------------|-----|-----|
|              | T                                   | S   | B   |
| UperNet [14] | 0.2                                 | 0.3 | 0.4 |
| FPN [4]      | 0.1                                 | 0.2 | 0.2 |

Table 2. Stochastic depth rate of InceptionNeXt backbone with UperNet and FPN for ADE20K semantic segmentation.

\*Corresponding Author.

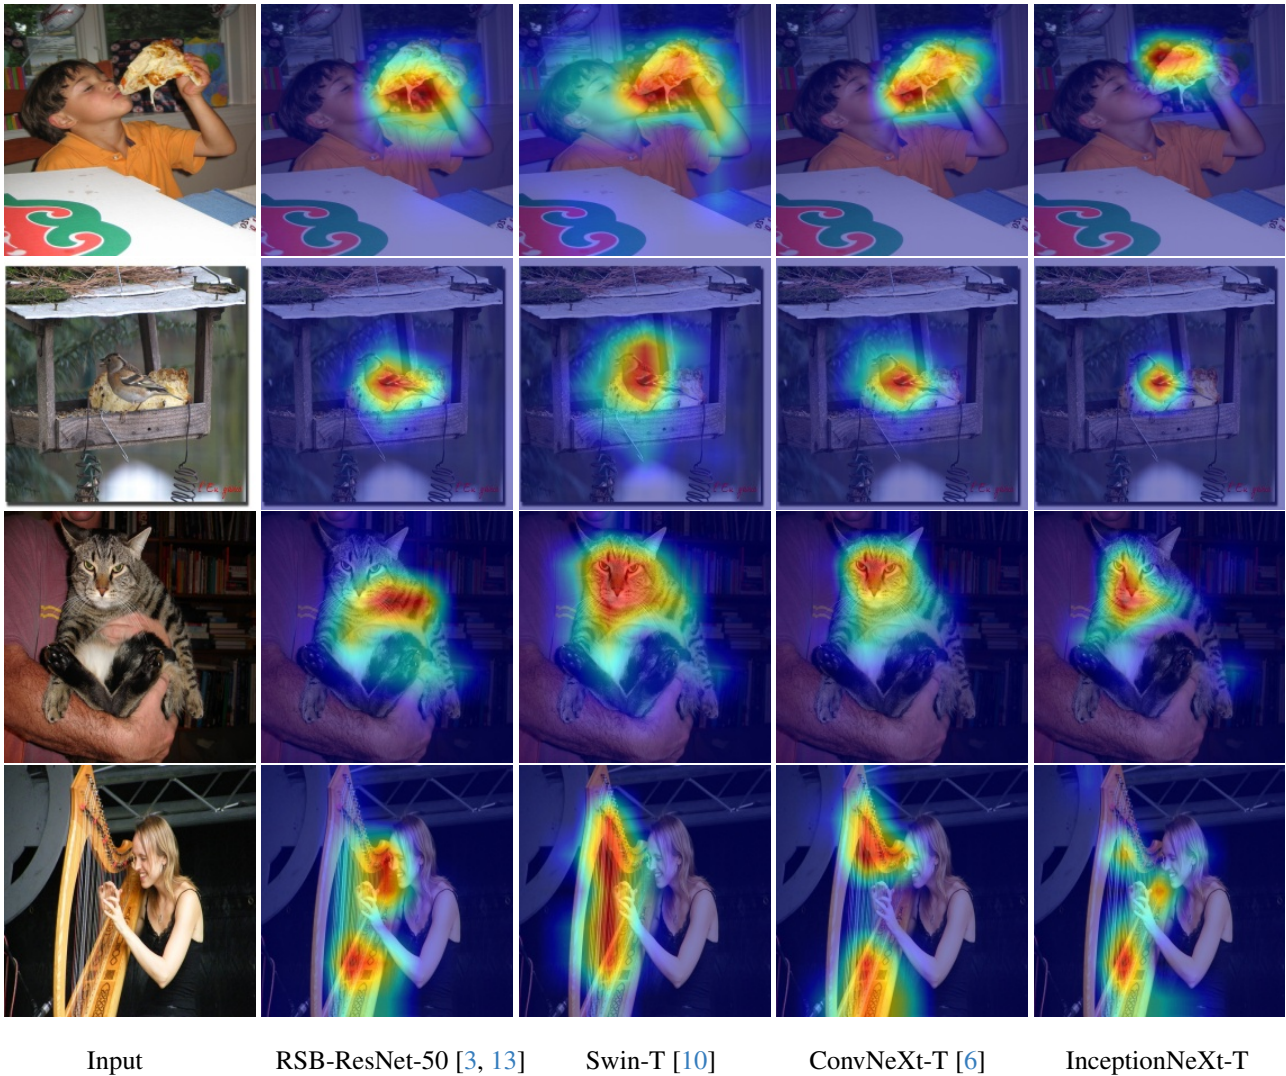

Figure 1. Grad-CAM [9] activation maps of different models trained on ImageNet-1K. The visualized images are from the validation set of ImageNet-1K.

## References

- [1] MMSegmentation Contributors. MMSegmentation: Openmmlab semantic segmentation toolbox and benchmark. <https://github.com/open-mmlab/mms Segmentation>, 2020. 1
- [2] Jia Deng, Wei Dong, Richard Socher, Li-Jia Li, Kai Li, and Li Fei-Fei. Imagenet: A large-scale hierarchical image database. In *2009 IEEE conference on computer vision and pattern recognition*, pages 248–255. Ieee, 2009. 1
- [3] Kaiming He, Xiangyu Zhang, Shaoqing Ren, and Jian Sun. Deep residual learning for image recognition. In *Proceedings of the IEEE conference on computer vision and pattern recognition*, pages 770–778, 2016. 1, 2
- [4] Alexander Kirillov, Ross Girshick, Kaiming He, and Piotr Dollár. Panoptic feature pyramid networks. In *Proceedings of the IEEE/CVF Conference on Computer Vision and Pattern Recognition*, pages 6399–6408, 2019. 1
- [5] Ze Liu, Yutong Lin, Yue Cao, Han Hu, Yixuan Wei, Zheng Zhang, Stephen Lin, and Baining Guo. Swin transformer: Hierarchical vision transformer using shifted windows. In *Proceedings of the IEEE/CVF international conference on computer vision*, pages 10012–10022, 2021. 1
- [6] Zhuang Liu, Hanzi Mao, Chao-Yuan Wu, Christoph Feichtenhofer, Trevor Darrell, and Saining Xie. A convnet for the 2020s. In *Proceedings of the IEEE/CVF Conference on Computer Vision and Pattern Recognition*, pages 11976–11986, 2022. 1, 2
- [7] Adam Paszke, Sam Gross, Francisco Massa, Adam Lerer, James Bradbury, Gregory Chanan, Trevor Killeen, Zeming Lin, Natalia Gimelshein, Luca Antiga, et al. Pytorch: An imperative style, high-performance deep learning library. *Ad-*

*vances in neural information processing systems*, 32, 2019. [1](#)

- [8] Olga Russakovsky, Jia Deng, Hao Su, Jonathan Krause, Sanjeev Satheesh, Sean Ma, Zhiheng Huang, Andrej Karpathy, Aditya Khosla, Michael Bernstein, et al. Imagenet large scale visual recognition challenge. *International journal of computer vision*, 115:211–252, 2015. [1](#)
- [9] Ramprasaath R Selvaraju, Michael Cogswell, Abhishek Das, Ramakrishna Vedantam, Devi Parikh, and Dhruv Batra. Grad-cam: Visual explanations from deep networks via gradient-based localization. In *Proceedings of the IEEE international conference on computer vision*, pages 618–626, 2017. [1](#), [2](#)
- [10] Hugo Touvron, Matthieu Cord, Matthijs Douze, Francisco Massa, Alexandre Sablayrolles, and Hervé Jégou. Training data-efficient image transformers & distillation through attention. In *International conference on machine learning*, pages 10347–10357. PMLR, 2021. [2](#)
- [11] Wenhai Wang, Enze Xie, Xiang Li, Deng-Ping Fan, Kaitao Song, Ding Liang, Tong Lu, Ping Luo, and Ling Shao. Pyramid vision transformer: A versatile backbone for dense prediction without convolutions. In *Proceedings of the IEEE/CVF international conference on computer vision*, pages 568–578, 2021. [1](#)
- [12] Ross Wightman. Pytorch image models. <https://github.com/rwightman/pytorch-image-models>, 2019. [1](#)
- [13] Ross Wightman, Hugo Touvron, and Hervé Jégou. Resnet strikes back: An improved training procedure in timm. *arXiv preprint arXiv:2110.00476*, 2021. [1](#), [2](#)
- [14] Tete Xiao, Yingcheng Liu, Bolei Zhou, Yuning Jiang, and Jian Sun. Unified perceptual parsing for scene understanding. In *Proceedings of the European conference on computer vision (ECCV)*, pages 418–434, 2018. [1](#)
- [15] Weihao Yu, Mi Luo, Pan Zhou, Chenyang Si, Yichen Zhou, Xinchao Wang, Jiashi Feng, and Shuicheng Yan. Metaformer is actually what you need for vision. In *Proceedings of the IEEE/CVF conference on computer vision and pattern recognition*, pages 10819–10829, 2022. [1](#)
- [16] Bolei Zhou, Hang Zhao, Xavier Puig, Sanja Fidler, Adela Barriuso, and Antonio Torralba. Scene parsing through ade20k dataset. In *Proceedings of the IEEE conference on computer vision and pattern recognition*, pages 633–641, 2017. [1](#)
